# Supplementary material for: Exploring the photocatalytic properties and carrier dynamics of 2D Janus XMMX′ (X = S, Se; M = Ga, In; and X′ = Te) materials
Source: Royal Society of Chemistry journal article supplement (doi:10.1039/d2cp03222h), 2022-01-01
Supplement: d2cp03222h1.pdf [file d2cp03222h1.pdf]

**Supplementary materials for “Exploring the Photocatalytic Properties and Carrier Dynamics of 2D Janus XMMX’ (X=S, Se; M = Ga, In; and X’ =Te) Materials”**

*Bofeng Zhang<sup>1</sup>, Akang Li<sup>1</sup>, Jiahe Lin<sup>2</sup>, WanZhen Liang<sup>1,\*</sup>*

<sup>1</sup> State Key Laboratory of Physical Chemistry of Solid Surfaces, Collaborative Innovation Center of Chemistry for Energy Materials, Fujian Provincial Key Laboratory of Theoretical and Computational Chemistry, and Department of Chemistry, College of Chemistry and Chemical Engineering, Xiamen University, Xiamen 361005, Fujian Province, People’s Republic of China

<sup>2</sup> School of Science, Jimei University, Xiamen 361021, Fujian Province, People’s Republic of China

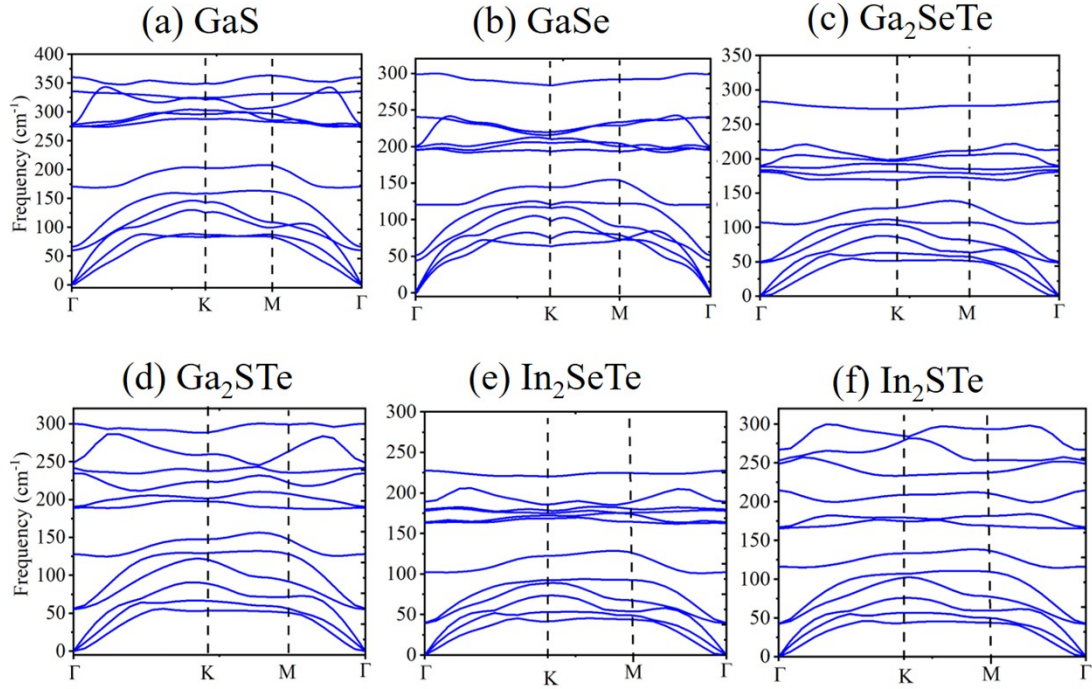

**Fig. S1.** (a)-(f) the phonon spectra of GaS, GaSe, Ga<sub>2</sub>SeTe, Ga<sub>2</sub>STe, In<sub>2</sub>SeTe and In<sub>2</sub>STe, respectively.

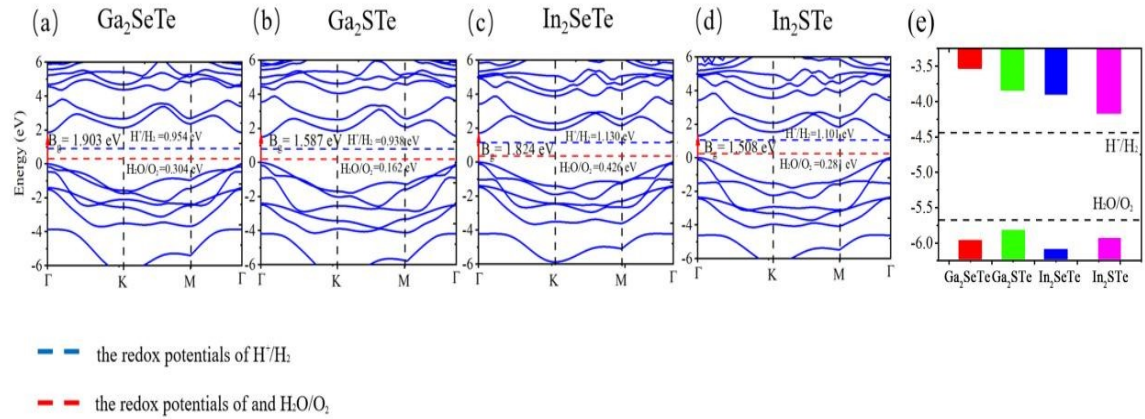

**Fig. S2.** (a)-(d) The band structures of Ga<sub>2</sub>SeTe, Ga<sub>2</sub>STe, In<sub>2</sub>SeTe and In<sub>2</sub>STe calculated by DFT with XC functional HSE06, compared with the standard redox potentials for water splitting shown as pink dashed lines and blue dashed lines, respectively. (e) the GW calculated band edge of Ga<sub>2</sub>SeTe, Ga<sub>2</sub>STe, In<sub>2</sub>SeTe and In<sub>2</sub>STe.

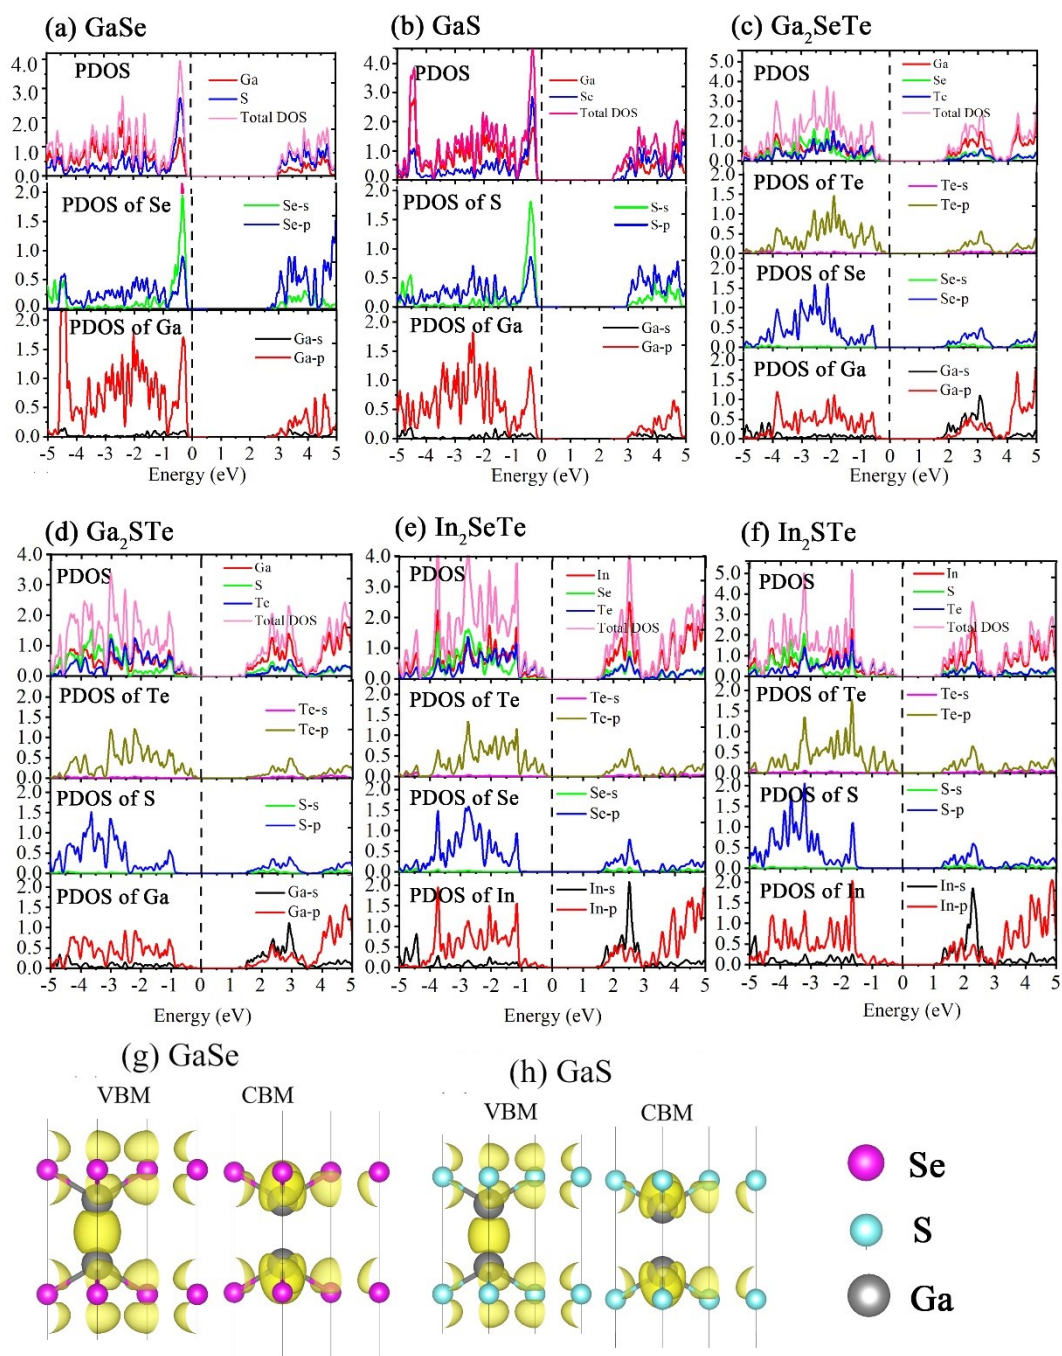

**Fig. S3.** (a)-(f) The PDOS of Janus XMMX' and pristine MX monolayers. (g) and (h) charge density of CBM (right) and VBM (left) of GaSe and GaS.



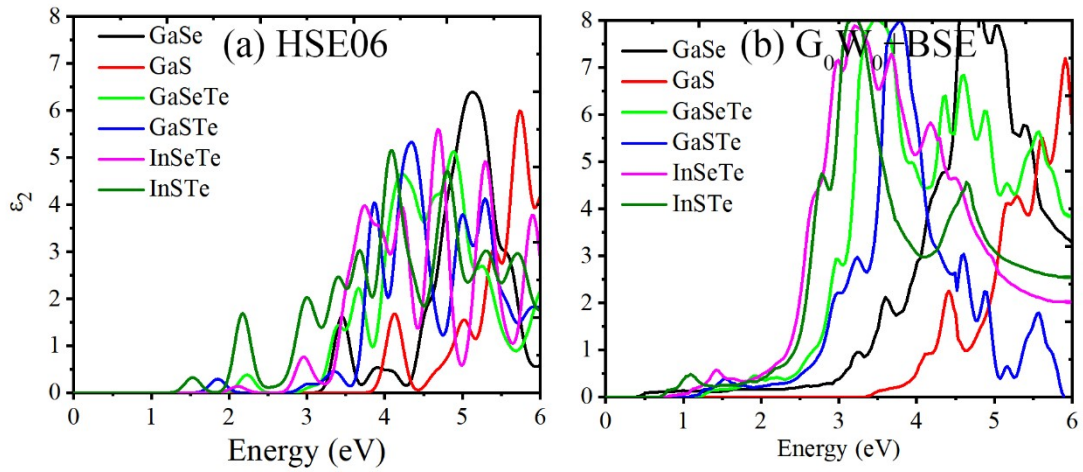

**Fig. S4.** (a) and (b) Imaginary parts of the dielectric functions of GaSe, GaS, Ga<sub>2</sub>SeTe, Ga<sub>2</sub>STe, In<sub>2</sub>SeTe and In<sub>2</sub>STe calculated by the independent particle model with HSE06 and the GW+BSE approach, respectively.

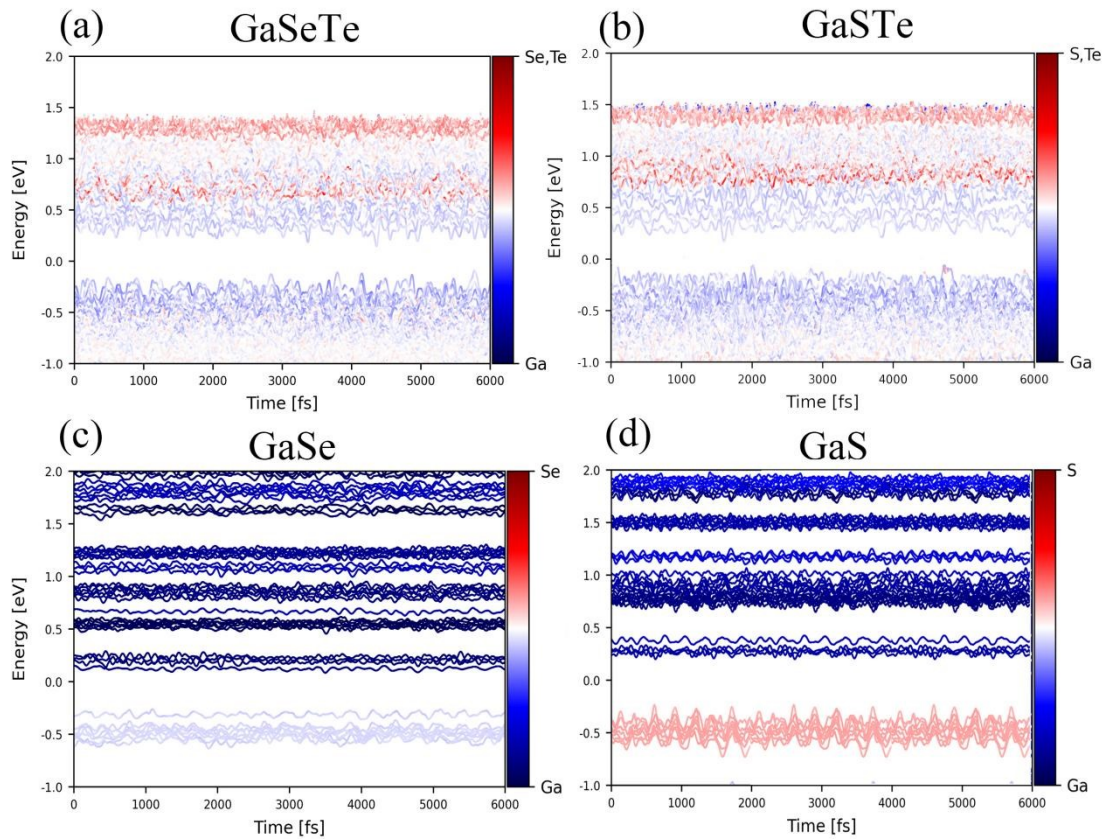

**Fig. S5** (a)-(d) Time evolutions of the energy states for the Ga<sub>2</sub>SeTe, Ga<sub>2</sub>STe, GaSe and GaS, respectively, and the color map indicates the orbital localization. The red lines and blue lines stand for the contribution from X and X' atoms and M atoms, respectively.

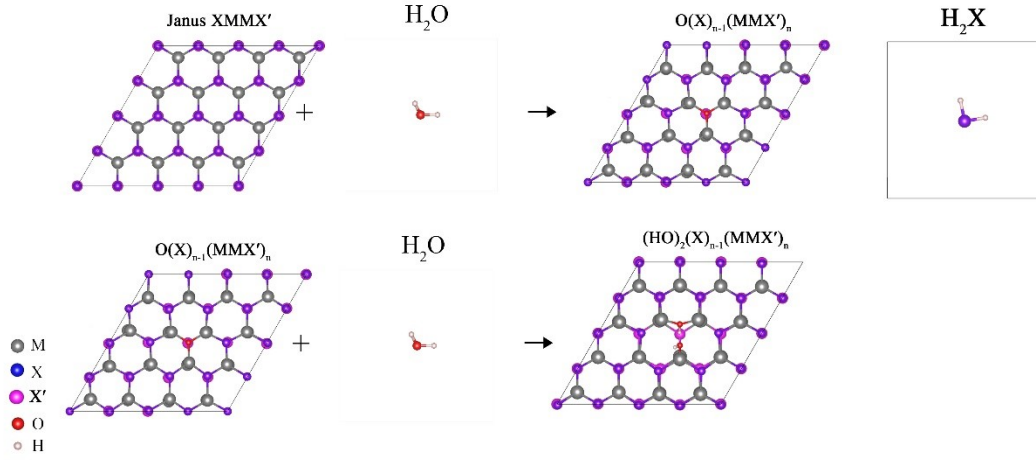

**Fig. S6** Diagram of hydration reaction of Janus XMMX'.

**Table SI** Calculated formation enthalpy,  $\Delta H$  (in eV), for the hydration reaction of Janus XMMX'. Here  $H_A = H_{O(X)_{n-1}(MMX')_n} + H_{H_2S} - H_{XMMX'} - H_{H_2O}$ .  $H_B = H_{(HO)_2(X)_{n-1}(MMX')_n} - H_{O(X)_{n-1}(MMX')_n} - H_{H_2O}$  and  $\Delta H = H_A + H_B$ .

|                      | $H_A$  | $H_B$  | $\Delta H$ |
|----------------------|--------|--------|------------|
| Ga <sub>2</sub> SeTe | 49.027 | 8.7772 | 57.8042    |
| Ga <sub>2</sub> STe  | 50.431 | 8.3285 | 58.7595    |
| In <sub>2</sub> SeTe | 9.157  | 6.9261 | 16.0831    |
| In <sub>2</sub> STe  | 10.932 | 6.5423 | 17.4743    |

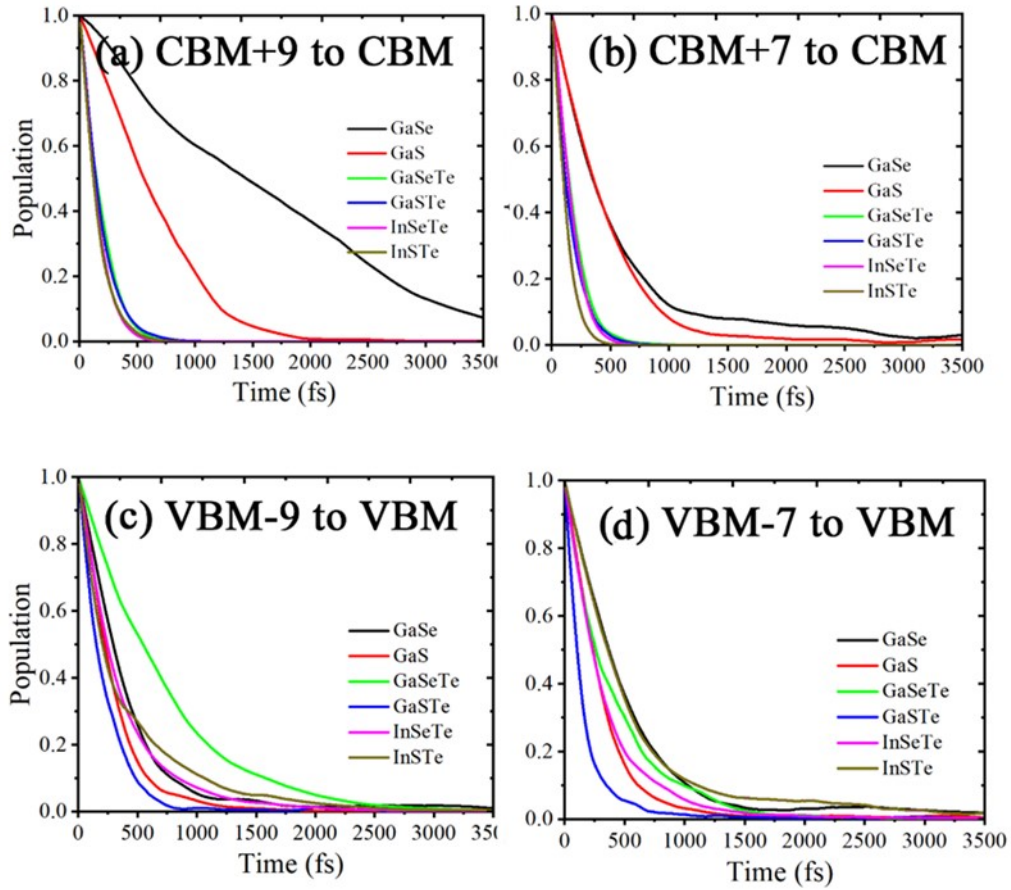

**Fig. S7** (a)(b) Electron relaxation dynamics from CBM+9 and CBM+7 to CBM in Janus XMMX' and pristine MX. (c)(d) Hole relaxation dynamics from VBM-9 and VBM-7 to VBM in Janus XMMX' and pristine MX.
